# Supplementary material for: Structural insight and in silico prediction of the pharmacokinetic parameters and toxicity of alkaline earth metal compounds strontium and barium with the non-steroidal anti-inflammatory drug nimesulide
Source: Royal Society of Chemistry journal article supplement (doi:10.1039/d4dt00446a), 2024-01-01
Supplement: d4dt00446a1.pdf [file d4dt00446a1.pdf]

Supporting information

**Structural insight and in silico prediction of pharmacokinetic parameters  
of alkaline earth metals compounds: strontium and barium with  
non-steroidal anti-inflammatory drug nimesulide**

Malgorzata Rybczyńska<sup>1</sup> and Artur Sikorski<sup>1,\*</sup>

<sup>1</sup> Faculty of Chemistry of the University of Gdansk, Wita Stwosza 63 Str., 80-308 Gdansk,  
Poland

e-mail corresponding author: [artur.sikorski@ug.edu.pl](mailto:artur.sikorski@ug.edu.pl)

## **Synthesis**

Nimesulide, strontium hydroxide and barium hydroxide were delivered from Sigma-Aldrich and used without preliminary purification. Melting points were determined on a Büchi M-565 (Flawil, Switzerland) capillary apparatus and were uncorrected.

### *Compound 1*

Nimesulide (0.050 g, 0.162 mmol) and strontium hydroxide (0.020 g, 0.162 mmol) were dissolved in 20 mL of an ethanol/water mixture (1:1 v/v) and heated for 20 min to dissolve the sample. The solution was allowed to evaporate at room temperature for a few days to give yellow crystals of compound **2** (m.p. = 244°C).

### *Compound 2*

Nimesulide (0.050 g, 0.162 mmol) and barium hydroxide (0.028 g, 0.162 mmol) were dissolved in 20 mL of an ethanol/water mixture (1:1 v/v) and heated for 20 min to dissolve the sample. The solution was allowed to evaporate at room temperature for a few days to give orange crystals of compound **1** (m.p. = 221°C).

## **Single-Crystal X-Ray Diffraction (SCXRD) measurements**

SCXRD data were collected on an Oxford Diffraction Gemini R ULTRA Ruby CCD diffractometer MoK $\alpha$  ( $\lambda_{\text{Mo}}=0.71073$  Å, T=293(2) K) (Table 1S, Fig. S1)[1]. CrysAlis RED software [1] (ver. 1.171.41.16a) was used to reduce diffraction data. SHELX package [2] (ver. 2017/1) was used to solve and refine received structures. Interactions were calculated using PLATON (ver. 181115) [3]. PLUTO-78 [4], ORTEPII [5] and Mercury [6] (ver. 2020.2.0) programs were used for preparing graphics. The benzene rings and nitro group in one nimesulide anion in compound **1** have disordered orientations with refined site-occupancy factors of the disordered parts of 0.610(7) and 0.390(7) (the disordered benzene rings were refined as rigid ideal hexagons with  $d(\text{C}-\text{C}) = 1.39$  Å and constrained with isotropic displacement parameters). All H atoms bound to aromatic C atoms were placed geometrically and refined using a riding model with  $d(\text{C}-\text{H}) = 0.93$  Å and  $U_{\text{iso}}(\text{H}) = 1.2U_{\text{eq}}(\text{C})$  ( $d(\text{C}-\text{H}) = 0.96$  Å and  $U_{\text{iso}}(\text{H}) = 1.5U_{\text{eq}}(\text{C})$  for methyl group). H atoms bound to O atoms from water molecules were located on a Fourier difference map and refined with restraints (DFIX command) with  $U_{\text{iso}}(\text{H}) = 1.5U_{\text{eq}}(\text{O})$ .

Full crystallographic details the structures reported in this paper have been deposited with the Cambridge Crystallographic Data Centre (deposition No. CCDC 2332827 and CCDC 2332828 for compounds **1** and **2** respectively) and they may be obtained from [www: http://www.ccdc.cam.ac.uk](http://www.ccdc.cam.ac.uk), e-mail: [deposit@ccdc.cam.ac.uk](mailto:deposit@ccdc.cam.ac.uk) or The Director, CCDC, 12 Union Road, Cambridge, CB2 1EZ, UK.

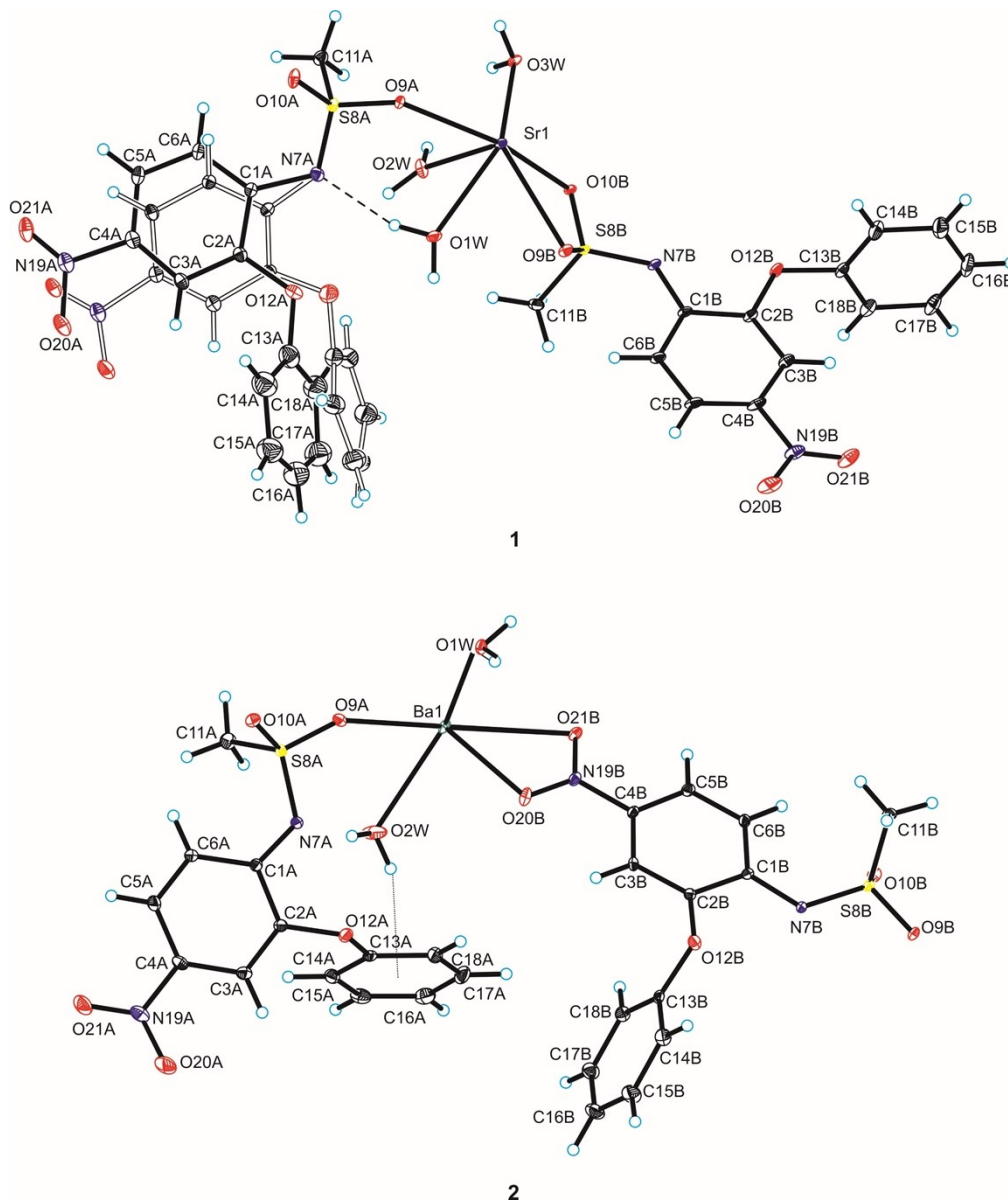

**Figure 1S.** Asymmetric unit in the crystals of compounds **1** and **2** showing the atom-labelling scheme. Displacement ellipsoids are drawn at the 25% probability level. H atoms are shown as small spheres of arbitrary radius (O–H···N hydrogen bond is represented by dashed lines, whereas O–H··· $\pi$  interactions by dotted line). In the figure of asymmetric unit of compound **1**, the disordered part of the nimesulide anion A is shown with unfilled lines.

### References

- [1] CrysAlis CCD and CrysAlis RED. Version 1.171.36.24. Oxford Diffraction Ltd. (Yarnton, 2012).
- [2] Sheldrick, G. M. Crystal structure refinement with SHELXL. *Acta Cryst.* 2015, C71(1), 3–8.
- [3] Spek, A. L. Single-crystal structure validation with the program PLATON. *J. Appl. Cryst.* 2003, 36, 7–13.
- [4] Johnson, C. K. ORTEP II. Report ORNL-5138. ORNL (Oak Ridge, 1976).
- [5] Motherwell, S.; Clegg. S. PLUTO-78. Program for Drawing and Molecular Structure. UC (Cambridge, 1978).
- [6] Macrae, C. F. et al. Mercury CSD 2.0-New Features for the Visualization and Investigation of Crystal Structures. *J. Appl. Crystallogr.* 2008, 41(2), 466–470.

**Table 1S.** Crystal data and structure refinement for compounds **1** and **2**.

| Compound                                                                | <b>1</b>                                                                         | <b>2</b>                                                                         |
|-------------------------------------------------------------------------|----------------------------------------------------------------------------------|----------------------------------------------------------------------------------|
| Chemical formula                                                        | C <sub>26</sub> H <sub>28</sub> N <sub>4</sub> O <sub>13</sub> S <sub>2</sub> Sr | C <sub>26</sub> H <sub>26</sub> N <sub>4</sub> O <sub>12</sub> S <sub>2</sub> Ba |
| Formula weight/g·mol <sup>-1</sup>                                      | 756.26                                                                           | 787.97                                                                           |
| Crystal system                                                          | monoclinic                                                                       | monoclinic                                                                       |
| Space group                                                             | <i>P</i> 2 <sub>1</sub> / <i>n</i>                                               | <i>I</i> 2/ <i>a</i>                                                             |
| <i>a</i> /Å                                                             | 34.835(5)                                                                        | 26.2150(11)                                                                      |
| <i>b</i> /Å                                                             | 7.2995(5)                                                                        | 7.9077(3)                                                                        |
| <i>c</i> /Å                                                             | 14.2995(17)                                                                      | 31.5526(17)                                                                      |
| $\alpha$ /°                                                             | 90                                                                               | 90                                                                               |
| $\beta$ /°                                                              | 114.459(17)                                                                      | 113.318(6)                                                                       |
| $\gamma$ /°                                                             | 90                                                                               | 90                                                                               |
| <i>V</i> /Å <sup>3</sup>                                                | 3309.7(8)                                                                        | 6006.6(5)                                                                        |
| <i>Z</i>                                                                | 4                                                                                | 8                                                                                |
| <i>T</i> /K                                                             | 291(2)                                                                           | 291(2)                                                                           |
| $\lambda_{\text{Mo}}$ /Å                                                | 0.71073                                                                          | 0.71073                                                                          |
| $\rho_{\text{calc}}$ /g·cm <sup>-3</sup>                                | 1.518                                                                            | 1.743                                                                            |
| <i>F</i> (000)                                                          | 1544                                                                             | 3152                                                                             |
| $\mu$ /mm <sup>-1</sup>                                                 | 1.823                                                                            | 1.531                                                                            |
| $\theta$ range/°                                                        | 3.39 - 25.00                                                                     | 3.33 - 25.00                                                                     |
| Completeness $\theta$ /%                                                | 99.7                                                                             | 99.8                                                                             |
| Reflections collected                                                   | 24319                                                                            | 19993                                                                            |
| Reflections<br>unique                                                   | 5813<br>[ <i>R</i> <sub>int</sub> =0.1311]                                       | 5286<br>[ <i>R</i> <sub>int</sub> =0.0501]                                       |
| Data/restraints/parameters                                              | 5813/480/580                                                                     | 5286/4/420                                                                       |
| Goodness of fit on <i>F</i> <sup>2</sup>                                | 0.986                                                                            | 1.020                                                                            |
| Final <i>R</i> <sub>1</sub> value ( <i>I</i> >2 $\sigma$ ( <i>I</i> ))  | 0.0567                                                                           | 0.0358                                                                           |
| Final <i>wR</i> <sub>2</sub> value ( <i>I</i> >2 $\sigma$ ( <i>I</i> )) | 0.1029                                                                           | 0.0682                                                                           |
| Final <i>R</i> <sub>1</sub> value (all data)                            | 0.1351                                                                           | 0.0521                                                                           |
| Final <i>wR</i> <sub>2</sub> value (all data)                           | 0.1295                                                                           | 0.0734                                                                           |
| CCDC number                                                             | 2332827                                                                          | 2332828                                                                          |

**Table 2S.** Hydrogen-bond and X–H... $\pi$  interactions geometry in the crystals of compounds **1** and **2** (Å, °).

| Compound                                                                                                     | D–H...A                         | $d(\text{D–H})$ [Å] | $d(\text{H...A})$ [Å] | $d(\text{D...A})$ [Å] | $\angle\text{D–H...A}$ (°) |
|--------------------------------------------------------------------------------------------------------------|---------------------------------|---------------------|-----------------------|-----------------------|----------------------------|
| <b>1</b>                                                                                                     | O1W–H1WA...N7A                  | 0.90(6)             | 1.98(6)               | 2.816(7)              | 153(6)                     |
|                                                                                                              | O1W–H1WB...O20B <sup>i</sup>    | 0.89(9)             | 2.21(7)               | 2.930(8)              | 138(8)                     |
|                                                                                                              | O2W–H2WA...O21A <sup>ii</sup>   | 0.89(6)             | 2.18(7)               | 2.989(9)              | 151(7)                     |
|                                                                                                              | O2W–H2WB...O10A <sup>iii</sup>  | 0.88(7)             | 1.98(6)               | 2.840(6)              | 167(6)                     |
|                                                                                                              | O3W–H3WA...O10A <sup>iii</sup>  | 0.90(5)             | 1.86(5)               | 2.731(7)              | 161(5)                     |
|                                                                                                              | O3W–H3WB...N7B <sup>iv</sup>    | 0.89(6)             | 1.90(5)               | 2.780(6)              | 170(5)                     |
|                                                                                                              | C5B–H5B...Cg1B <sup>i</sup>     | 0.93                | 2.78                  | 3.641(9)              | 154                        |
| Symmetry code: (i)1/2-x,1/2+y,3/2-z; (ii)-x,-1-y,-z; (iii)x,-1+y,z; (iv)1/2-x,-1/2+y,1/2-z.                  |                                 |                     |                       |                       |                            |
| <b>2</b>                                                                                                     | O1W–H1WA...O10A <sup>i</sup>    | 0.89(3)             | 2.27(4)               | 2.994(4)              | 139(3)                     |
|                                                                                                              | O1W–H1WB...O12B <sup>ii</sup>   | 0.89(4)             | 2.58(4)               | 3.240(4)              | 132(3)                     |
|                                                                                                              | O1W–H1WB...N7B <sup>ii</sup>    | 0.89(4)             | 2.01(4)               | 2.849(4)              | 158(4)                     |
|                                                                                                              | O2W–H2WB...N7A                  | 0.88(5)             | 2.03(5)               | 2.893(5)              | 168(7)                     |
|                                                                                                              | C11B–H11C...O20A <sup>iii</sup> | 0.96                | 2.58                  | 3.511(6)              | 163                        |
|                                                                                                              | C14B–H14B...O10A <sup>iv</sup>  | 0.93                | 2.58                  | 3.492(5)              | 168                        |
|                                                                                                              | O2W–H2WA...Cg2A <sup>v</sup>    | 0.89(3)             | 2.51                  | 3.159(5)              | 130(5)                     |
|                                                                                                              | C15A–H15A...Cg1A <sup>iv</sup>  | 0.93                | 2.96                  | 3.807(5)              | 153                        |
| Symmetry code: (i)-x,-1/2+y,1/2-z; (ii)1/2-x,3/2-y,1/2-z; (iii)x,3/2-y,-1/2+z; (iv)1/2+x,2-y,z; (v)x,1+y,-z. |                                 |                     |                       |                       |                            |

Cg represents the centre of gravity of the rings as follows: Cg1A ring C1A/C2A/C3A/C4A/C5A/C6A, Cg2A ring C13A/C14A/C15A/C16A/C17A/C18A, Cg1B ring C1B/C2B/C3B/C4B/C5B/C6B, Cg2B ring C13B/C14B/C15B/C16B/C17B/C18B.

**Table 3S.** S–O... $\pi$  and N–O... $\pi$  interactions geometry in the crystals of compounds **1** and **2** (Å, °).

| Compound                                                                    | X–Y...A                         | $d(\text{X–Y})$ [Å] | $d(\text{Y...A})$ [Å] | $d(\text{X...A})$ [Å] | $\angle\text{X–H...A}$ (°) |
|-----------------------------------------------------------------------------|---------------------------------|---------------------|-----------------------|-----------------------|----------------------------|
| <b>1</b>                                                                    | S8A–O10A...Cg2B <sup>v</sup>    | 1.453(4)            | 3.612(5)              | 4.391(4)              | 113.1(2)                   |
|                                                                             | N19A–O21A...Cg1A <sup>vi</sup>  | 1.232(9)            | 3.458(11)             | 3.710(19)             | 94.5(13)                   |
|                                                                             | N19B–O21B...Cg2A <sup>vii</sup> | 1.198(8)            | 3.008(15)             | 3.871(15)             | 128.5(6)                   |
| Symmetry code: (v)1/2-x,3/2+y,1/2-z; (vi)-x,-y,-z; (vii)1/2-x,-1/2+y,3/2-z. |                                 |                     |                       |                       |                            |
| <b>2</b>                                                                    | N19A–O21A...Cg2B <sup>vi</sup>  | 1.218(5)            | 3.215(6)              | 3.683(6)              | 102.9(3)                   |
| Symmetry code: (vi)1/2-x,1+y,1-z.                                           |                                 |                     |                       |                       |                            |

**Table 4S.**  $\pi$ – $\pi$  interactions geometry in the crystals of compounds **1** and **2** (Å, °).

| Compound d                                               | CgI  | CgJ                             | CgI...CgJ <sup>a</sup> [Å] | Dihedral angle <sup>b</sup> [°] | Interplanar distance <sup>c</sup> [Å] | Offset <sup>d</sup> [Å] |
|----------------------------------------------------------|------|---------------------------------|----------------------------|---------------------------------|---------------------------------------|-------------------------|
| <b>1</b>                                                 | Cg1A | Cg1A <sup>ii</sup>              | 3.903(8)                   | 0.0(6)                          | 3.479(5)                              | 1.770                   |
| Symmetry code: (ii)-x,-1-y,-z.                           |      |                                 |                            |                                 |                                       |                         |
| <b>2</b>                                                 | Cg2A | Cg2A <sup>vi</sup> <sub>i</sub> | 3.684(3)                   | 5.9(2)                          | 3.513(2)                              | 1.770                   |
|                                                          | Cg1B | Cg1B <sup>ii</sup>              | 3.962(2)                   | 0.0(2)                          | 3.283(2)                              | 2.218                   |
| Symmetry code: (ii)1/2-x,3/2-y,1/2-z; (vii) 1.2-x,y,1-z. |      |                                 |                            |                                 |                                       |                         |

<sup>a</sup>Cg...Cg – distance between ring centroids.

<sup>b</sup>Dihedral angle – angle between the mean planes of CgI and CgJ.

<sup>c</sup>Interplanar distance – perpendicular distance from CgI to ring J.

<sup>d</sup>Offset – perpendicular distance from ring I to ring J.



### ***Attenuated Total Reflectance – Fourier Transform Infrared Spectroscopy (ATR–FTIR)***

The ATR-FTIR spectra were acquired using a Perkin Elmer Spectrum 2™ instrument (Perkin Elmer, Waltham, USA) equipped with attenuated total reflectance (ATR) accessory. The spectra were recorded at room temperature in the spectral range from 4000 to 500  $\text{cm}^{-1}$  at a resolution of 4  $\text{cm}^{-1}$  averaging 16 scans for each measurement.

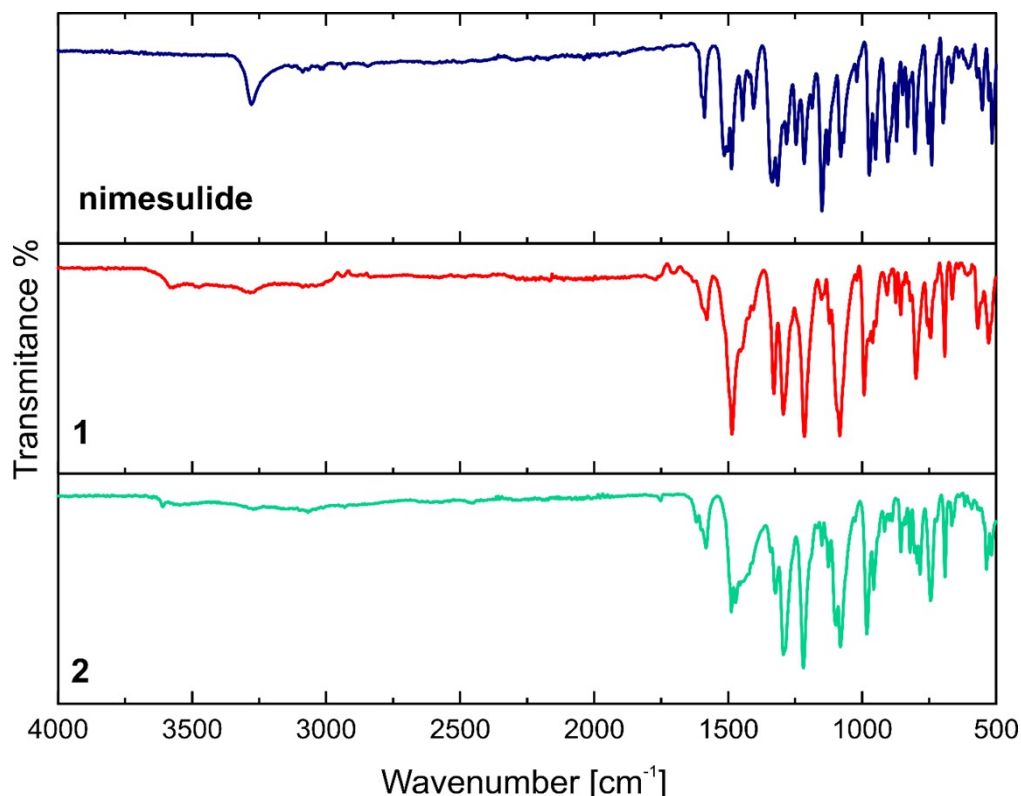

**Figure 2S.** ATR-FTIR spectra of studied compounds in the range of 4000–500  $\text{cm}^{-1}$ .

Nimesulide, ATR-FTIR ( $\text{cm}^{-1}$ ): 3278 ( $\nu_{\text{NH}}$ ), 1589–1487 ( $\nu_{\text{C}=\text{C}}$ ), 1514 and 1316 ( $\nu_{\text{as}}$  and  $\nu_{\text{sym}}\text{NO}_2$ ), 1335 and 1150 ( $\nu_{\text{as}}$  and  $\nu_{\text{sym}}\text{SO}_2$ ), 1282–1069 ( $\nu_{\text{C}-\text{N}}$  and  $\nu_{\text{C}-\text{O}}$ ).

Compound **1**, ATR-FTIR ( $\text{cm}^{-1}$ ): 1582–1486 ( $\nu_{\text{C}=\text{C}}$  and  $\nu_{\text{as}}\text{NO}_2$ ), 1329 ( $\nu_{\text{as}}\text{SO}_2$  and/or  $\nu_{\text{sym}}\text{NO}_2$ ), 1150 (low-intensity band,  $\nu_{\text{sym}}\text{SO}_2$ ), 1293–1083 ( $\nu_{\text{C}-\text{N}}$  and  $\nu_{\text{C}-\text{O}}$ ).

Compound **2**, ATR-FTIR ( $\text{cm}^{-1}$ ): 1582–1472 ( $\nu_{\text{C}=\text{C}}$  and  $\nu_{\text{as}}\text{NO}_2$ ), 1341 and 1150 (low-intensity bands or shoulders,  $\nu_{\text{as}}\text{SO}_2$  and  $\nu_{\text{sym}}\text{SO}_2$ ), 1323 ( $\nu_{\text{sym}}\text{NO}_2$ ), 1293–1081 ( $\nu_{\text{C}-\text{N}}$  and  $\nu_{\text{C}-\text{O}}$ ).

## ADMET analysis

The web-service SWISS-ADME tool by the Swiss Institute of Bioinformatics (<http://www.swissadme.ch/>) was used to calculate physicochemical descriptors, important for drug discovery [1]. Compounds were analyzed to predict ADME (absorption, distribution, metabolism, and excretion) parameters. The web-service ProTOX II was used for the prediction of the toxicity of the title compounds [2]. For the ADME analysis, the inputs for compounds **1** and **2** were measured crystal structures. For both structures, we have generated the SMILE code and implemented it for analysis.

**Table 5S.** ADME diagrams for nimesulide and compounds **1** and **2**.

| compound   | ADME diagram                                                                        | XLOGP3 <sup>a</sup> | MW <sup>b</sup> | TPSA <sup>c</sup> | LOG S (ESOL) <sup>d</sup> | F. Csp <sup>3</sup> <sup>e</sup> | NRB <sup>f</sup> |
|------------|-------------------------------------------------------------------------------------|---------------------|-----------------|-------------------|---------------------------|----------------------------------|------------------|
| nimesulide | 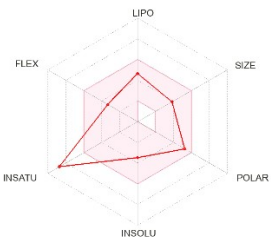   | 2.60                | 308.31          | 109.60            | -3.48                     | 0.08                             | 5                |
| <b>1</b>   |   | 3.42                | 756.27          | 222.83            | -6.41                     | 0.08                             | 10               |
| <b>2</b>   |  | 3.90                | 787.96          | 213.60            | -6.92                     | 0.08                             | 10               |

<sup>a</sup> – parameter for lipophilicity calculations [3]; <sup>b</sup> – molecular weight [g/mol]; <sup>c</sup> – topological polar surface area [ $\text{\AA}^2$ ] [4]; <sup>d</sup> – estimated solubility [5]; <sup>e</sup> – ratio of  $sp^3$  hybridized carbons over the total amount of carbons in molecule; <sup>f</sup> – number of rotatable bonds.



a)

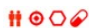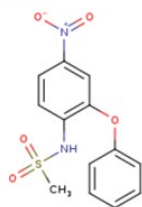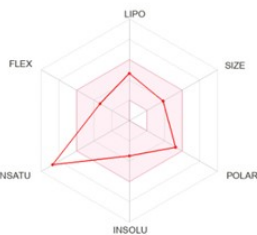

SMILES [O-][N+](=O)c1ccc(cc1)Oc1ccccc1NS(=O)(=O)C

#### Physicochemical Properties

|                        |              |
|------------------------|--------------|
| Formula                | C13H12N2O5S  |
| Molecular weight       | 308.31 g/mol |
| Num. heavy atoms       | 21           |
| Num. arom. heavy atoms | 12           |
| Fraction Csp3          | 0.08         |
| Num. rotatable bonds   | 5            |
| Num. H-bond acceptors  | 5            |
| Num. H-bond donors     | 1            |
| Molar Refractivity     | 80.05        |
| TPSA                   | 109.60 Å²    |

| Lipophilicity             |       |
|---------------------------|-------|
| Log $P_{ow}$ (ILOGP)      | 1.78  |
| Log $P_{ow}$ (XLOGP3)     | 2.60  |
| Log $P_{ow}$ (WLOGP)      | 3.65  |
| Log $P_{ow}$ (MLOGP)      | 1.73  |
| Log $P_{ow}$ (SILICOS-IT) | -0.62 |
| Consensus Log $P_{ow}$    | 1.83  |

| Water Solubility   |                                 |
|--------------------|---------------------------------|
| Log S (ESOL)       | -3.48                           |
| Solubility         | 1.02e-01 mg/ml ; 3.29e-04 mol/l |
| Class              | Soluble                         |
| Log S (Ali)        | -4.55                           |
| Solubility         | 8.67e-03 mg/ml ; 2.81e-05 mol/l |
| Class              | Moderately soluble              |
| Log S (SILICOS-IT) | -4.38                           |
| Solubility         | 1.27e-02 mg/ml ; 4.13e-05 mol/l |
| Class              | Moderately soluble              |

| Pharmacokinetics            |            |
|-----------------------------|------------|
| GI absorption               | High       |
| BBB permeant                | No         |
| P-gp substrate              | No         |
| CYP1A2 inhibitor            | Yes        |
| CYP2C19 inhibitor           | Yes        |
| CYP2C9 inhibitor            | Yes        |
| CYP2D6 inhibitor            | No         |
| CYP3A4 inhibitor            | No         |
| Log $K_p$ (skin permeation) | -6.33 cm/s |

| Druglikeness          |                  |
|-----------------------|------------------|
| Lipinski              | Yes; 0 violation |
| Ghose                 | Yes              |
| Veber                 | Yes              |
| Egan                  | Yes              |
| Muegge                | Yes              |
| Bioavailability Score | 0.55             |

| Medicinal Chemistry     |                                                    |
|-------------------------|----------------------------------------------------|
| PAINS                   | 0 alert                                            |
| Brenk                   | 2 alerts: nitro_group, oxygen-nitrogen_single_bond |
| Leadlikeness            | Yes                                                |
| Synthetic accessibility | 3.08                                               |

b)

### Molecule 1

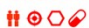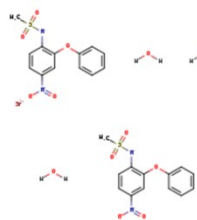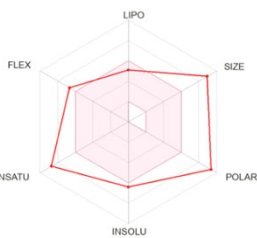

SMILES [O-][N+](=O)c1ccc(cc1)Oc1ccccc1[N-]S(=O)(=O)C.[O-][N+](=O)c1ccc(cc1)Oc1ccccc1[N-]S(=O)(=O)C.[Sr+2].O.O.O

#### Physicochemical Properties

|                        |                 |
|------------------------|-----------------|
| Formula                | C26H28N4O13S2Sr |
| Molecular weight       | 756.27 g/mol    |
| Num. heavy atoms       | 46              |
| Num. arom. heavy atoms | 24              |
| Fraction Csp3          | 0.08            |
| Num. rotatable bonds   | 10              |
| Num. H-bond acceptors  | 15              |
| Num. H-bond donors     | 3               |
| Molar Refractivity     | 168.40          |
| TPSA                   | 222.83 Å²       |

| Lipophilicity             |       |
|---------------------------|-------|
| Log $P_{ow}$ (ILOGP)      | 0.00  |
| Log $P_{ow}$ (XLOGP3)     | 3.42  |
| Log $P_{ow}$ (WLOGP)      | 8.67  |
| Log $P_{ow}$ (MLOGP)      | 0.53  |
| Log $P_{ow}$ (SILICOS-IT) | -0.62 |
| Consensus Log $P_{ow}$    | 2.40  |

| Water Solubility   |                                 |
|--------------------|---------------------------------|
| Log S (ESOL)       | -6.41                           |
| Solubility         | 2.95e-04 mg/ml ; 3.89e-07 mol/l |
| Class              | Poorly soluble                  |
| Log S (Ali)        | -7.78                           |
| Solubility         | 1.26e-05 mg/ml ; 1.66e-08 mol/l |
| Class              | Poorly soluble                  |
| Log S (SILICOS-IT) | -4.38                           |
| Solubility         | 3.12e-02 mg/ml ; 4.13e-05 mol/l |
| Class              | Moderately soluble              |

| Pharmacokinetics            |            |
|-----------------------------|------------|
| GI absorption               | Low        |
| BBB permeant                | No         |
| P-gp substrate              | No         |
| CYP1A2 inhibitor            | No         |
| CYP2C19 inhibitor           | No         |
| CYP2C9 inhibitor            | Yes        |
| CYP2D6 inhibitor            | No         |
| CYP3A4 inhibitor            | No         |
| Log $K_p$ (skin permeation) | -8.49 cm/s |

| Druglikeness          |                                                        |
|-----------------------|--------------------------------------------------------|
| Lipinski              | No; 2 violations: MW>500, NorO>10                      |
| Ghose                 | No; 4 violations: MW>480, WLOGP>5.6, MR>130, #atoms>70 |
| Veber                 | No; 1 violation: TPSA>140                              |
| Egan                  | No; 2 violations: WLOGP>5.88, TPSA>131.6               |
| Muegge                | No; 3 violations: MW>600, TPSA>150, H-acc>10           |
| Bioavailability Score | 0.17                                                   |

| Medicinal Chemistry     |                                                    |
|-------------------------|----------------------------------------------------|
| PAINS                   | 0 alert                                            |
| Brenk                   | 2 alerts: nitro_group, oxygen-nitrogen_single_bond |
| Leadlikeness            | No; 2 violations: MW>350, Rotors>7                 |
| Synthetic accessibility | 4.66                                               |

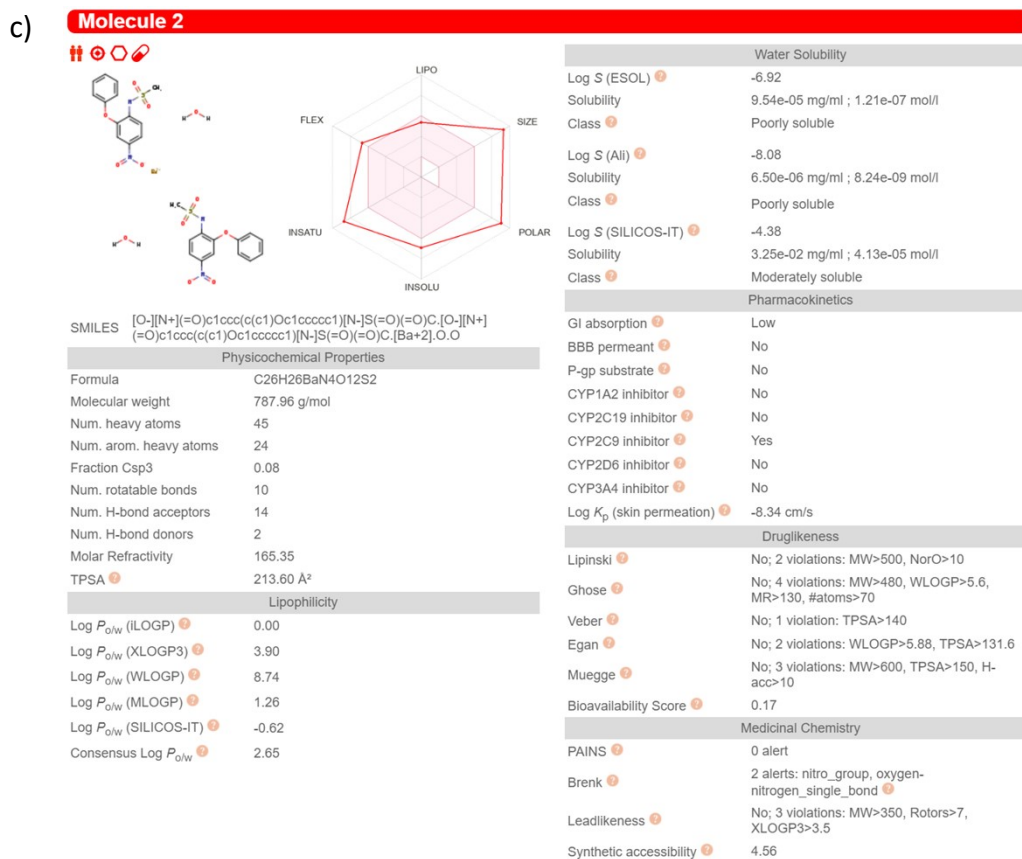

**Figure 3S.** ADME analysis for nimesulide (a) and for compounds **1** (b) and **2** (c).

## References

- [1] Daina, A.; Michielin, O.; Zoete, V. SwissADME: A free web tool to evaluate pharmacokinetics, drug-likeness and medicinal chemistry friendliness of small molecules. *Sci. Rep.* 2017, 7, 42717.
- [2] Tetko, I. V.; Bruneau, P.; Mewes, H. W.; Rohrer, D. C.; Poda, G. I. Can we estimate the accuracy of ADME–Tox predictions? *Drug Discov. Today* 2006, 11, 700–707.
- [3] Cheng, T.; Zhao, Y.; Li, X.; Lin, F.; Xu, Y.; Zhang, X.; Lai, L. Computation of Octanol–Water Partition Coefficients by Guiding an Additive Model with Knowledge. *Journal of Chemical Information and Modeling* 2007, 47(6), 2140–2148.
- [4] Ertl, P.; Rohde, B.; Selzer, P. Fast Calculation of Molecular Polar Surface Area as a Sum of Fragment-Based Contributions and Its Application to the Prediction of Drug Transport Properties. *Journal of Medicinal Chemistry* 2000, 43(20), 3714–3717.
- [5] Delaney, J. S. ESOL: Estimating Aqueous Solubility Directly from Molecular Structure. *Journal of Chemical Information and Computer Sciences* 2004, 44(3), 1000–1005.
